# Supplementary material for: Faecalibacterium predicts postprandial glucose control following potatoes in overweight females
Source: Research Square preprint supplement (doi:10.21203/rs.3.rs-885610/v1), 2021-11-19
Supplement: Supplementary file 1 [file ff2143fc2206a697bff0c883.docx]

**Supplement Table 1**. Input Variables by Data Category

| **Variable Group** | **Parameter** |
| --- | --- |
| Demographics | Age, race/ethnicity (White, Hispanic, Black, Asian), sequence of potato randomization |
| Anthropometrics | Body mass index, waist circumference, percent body fat, percent fat free mass |
| Diet | Energy, fat (and % of calories), carbohydrates (and % of calories), protein (and % of calories), saturated fatty acids, monounsaturated fatty acids, polyunsaturated fatty acids, trans fatty acids, total sugar, added sugar, aspartame, available carbohydrates, total fiber, insoluble fiber, soluble fiber, glycemic index, glycemic load |
| α-Diversity | Shannon Index, Simpson Index |
| Taxa* | Proteobacteria (Phyla), Actinobacteria (Phyla), Verrucomicrobia (Phyla), Lachnospiraceae (Family), *Bacteroides, Faecalibacterium Prevotella 9, Bifidobacterium, Alistipes, Subdoligranulum, Blautia, Parabacteroides, Roseburia, Eubacterium copro group, Ruminococcus 1, Ruminococcus 2, Lachnoclostridium, Akkermansia, Ruminiclostridum, Prevotella, Eubacterium eligens (species)* |

*Genus unless otherwise labeled
